# Supplementary material
Source: HighWire-hosted journal article supplement (http://www.qdcxjkg.com/highwire/filestream/113606/field_highwire_adjunct_files/11/patient_info__-_tests_conducted_in_tb_clinics_-_polish.pdf)
Supplement: patient_info__-_tests_conducted_in_tb_clinics_-_polish.pdf [file patient_info__-_tests_conducted_in_tb_clinics_-_polish.pdf]

## Badania przeprowadzane w Przychodniach Przeciwgruźliczych

### Prześwietlenie klatki piersiowej

Badanie to przeprowadza się w celu sprawdzenia, czy cierpicie Państwo na gruźlicę płuc. Może ono zostać później powtórzone, aby przekonać się o skuteczności leczenia.

### Badanie plwociny/ flegmy

Możecie Państwo zostać poproszeni o zapewnienie próbek plwociny, aby sprawdzić, czy cierpicie na gruźlicę płuc. Badanie to może zostać później powtórzone, aby przekonać się o skuteczności leczenia.

### Badania krwi

Badania krwi mogą wykazać, czy macie Państwo anemię lub ulegliście infekcji. Powtórzenie tych badań po rozpoczęciu leczenia umożliwia nam określenie, czy infekcja mija.

Inne badania są przeprowadzane w celu kontroli pracy wątroby i nerek przed rozpoczęciem i w trakcie leczenia. Badania te są ważne, gdyż niektóre z przyjmowanych leków mogą wpłynąć na funkcjonowanie wątroby i nerek.

## Badania innych infekcji

Wszystkim osobom, które przychodzą do Przychodni Przeciwgruźliczej oferujemy badanie na obecność wirusa HIV. Wirus HIV niszczy system obronny organizmu, a w związku z tym łatwiej można zachorować na gruźlicę. Istnieje dobry sposób leczenia osób zakażonych wirusem HIV, który może polepszyć stan zdrowia.

## Badania innych infekcji

Możemy również przebadać, czy nie nastąpiło zakażenie wirusem zapalenia wątroby typu B i C. Infekcje te mogą zmienić sposób pracy wątroby i wpłynąć na leczenie przeciwgruźlicze. Jeśli wynik badania będzie pozytywny, możecie Państwo zostać skierowani do specjalistycznego zespołu.

## Poufność

Wyniki wszystkich badań będą traktowane jako poufne, a informacje zostaną przekazane wyłącznie przedstawicielom służby zdrowia, którzy biorą bezpośredni udział w opiece nad Państwem.

## Dalsze informacje

### Wirus HIV

NAHIP: [www.nahip.org.uk](http://www.nahip.org.uk)

Do It Right:

[www.doitright.uk.com](http://www.doitright.uk.com)

THT: [www.tht.org.uk](http://www.tht.org.uk)

### Gruźlica

NKS TB:

[www.hpa.org.uk/tbknowledge](http://www.hpa.org.uk/tbknowledge)

TB Alert: [www.tbalert.org](http://www.tbalert.org)

### Inne przydatne strony internetowe

NHS choices: [www.nhs.uk](http://www.nhs.uk)

Health Protection Agency:

[www.hpa.org.uk](http://www.hpa.org.uk)
